# Supplementary material for: Induction of focal adhesions and motility in Drosophila S2 cells
Source: PubMed Central journal article supplement — Mol Biol Cell. 2014 Dec 1;25(24):3861–9. doi: 10.1091/mbc.E14-04-0863 (PMC4244196; doi:10.1091/mbc.e14-04-0863), 2014-12-01
Supplement: supp_E14-04-0863v1_CombinedSupMats.pdf [file supp_E14-04-0863v1_CombinedSupMats.pdf]

# Supplemental Materials

*Molecular Biology of the Cell*

Ribeiro et al.

## Supplemental Material

**Supplemental Figure 1.** MSD plots of individual cell trajectories expressing  $\alpha$ -PS (A and C) or not (B and D) and plated on surfaces functionalized with vitronectin (A and B) or Con A (C and D). MSD plot of Figure 2B is an ensemble average of these individual trajectories. Y axis scale of graph A is different from the others. More than 20 cells from 2 independent experiments were analyzed.

**Supplemental Figure 2.** (A) MSD plots of individual cell trajectories expressing  $\alpha$ -PS and plated on surfaces with different rigidities: 2 MPa, 5 kPa and glass and functionalized with vitronectin. MSD plot of Figure 3C is an ensemble average of these individual trajectories. More than 30 cells from 2 independent experiments were analyzed. (B) MSD plots of individual cell trajectories expressing  $\alpha$ -PS after after 5 day RNAi of indicated proteins. MSD plot of Figure 3F is an ensemble average of these individual trajectories. More than 30 cells from 2 independent experiments were analyzed.

**Supplemental Figure 3.** Confinement ratio (ratio of the displacement of a cell to the total length that the cell travelled for 1 hr) of cell trajectories plated in different cell surfaces (A) or after 5 day RNAi of indicated proteins (B). Mean  $\pm$  SD (n > 20cells from 2 independent experiments).

**Supplemental Figure 4.** Kymographs of cell slices expressing  $\alpha$ -PS (A) and after 5 day RNAi treatment for Fak (B) and Pak3 (C).). Bar, 5  $\mu$ m.

**Supplemental Figure 5.** Relative frequency of average Focal Adhesion area after 5-day RNAi treatment for Myosin II and control cells. Average and SD values are indicated in the table (>30 cells per condition)

**Supplemental Movie 1.** Live cell imaging of  $\alpha$ -PS<sup>+</sup> expressing p130Cas-GFP corresponding to stills of the cell showed in Figure 4B. Acquisition every 2 min for 4 hr; 12 fps. Time, hr:min. Bar, 5  $\mu$ m.

**Supplemental Movie 2.** Live cell imaging of  $\alpha$ -PS<sup>+</sup> expressing p130Cas-GFP corresponding to stills of the cell showed in Figure 4C. Acquisition every 2 min for 4 hr; the movie plays at 12 fps. Time, hr:min. Bar, 5  $\mu$ m.

**Supplemental Movie 3.** Live cell imaging of  $\alpha$ -PS<sup>+</sup> expressing p130Cas-GFP after 5-day RNAi treatment for FAK. TIRF microscopy imaging every 2 min for 3 hr; the movie is playing at 12 fps. Time, hr:min. Bar, 5  $\mu$ m.

**Supplemental Movie 4.** Live cell imaging of  $\alpha$ -PS<sup>+</sup> expressing p130Cas-GFP after 5-day RNAi treatment for FAK. TIRF microscopy imaging every 2 min for 3 hr; the movie is playing at 12 fps. Time, hr:min. Bar, 5  $\mu$ m.

**Supplemental Movie 5.** Live cell imaging of  $\alpha$ -PS<sup>+</sup> expressing p130Cas-GFP after 5-day RNAi treatment for Pak3. TIRF microscopy imaging every 2 min for 3 hr; the movie is playing at 12 fps. Time, hr:min. Bar, 5  $\mu$ m.

**Supplemental Movie 6.** Live cell imaging of  $\alpha$ -PS<sup>+</sup> expressing p130Cas-GFP after 5-day RNAi treatment for Pak3. TIRF microscopy imaging every 2 min for 3 hr; the movie is playing at 12 fps. Time, hr:min. Bar, 5  $\mu$ m.

**Supplemental Movie 7.** Live cell imaging of  $\alpha$ -PS<sup>+</sup> expressing p130Cas-GFP corresponding to stills of the cell showed in Figure 4F. Acquisition every 2 min for 3 hr; the movie plays at 12 fps. Time, hr:min. Bar, 5  $\mu$ m.

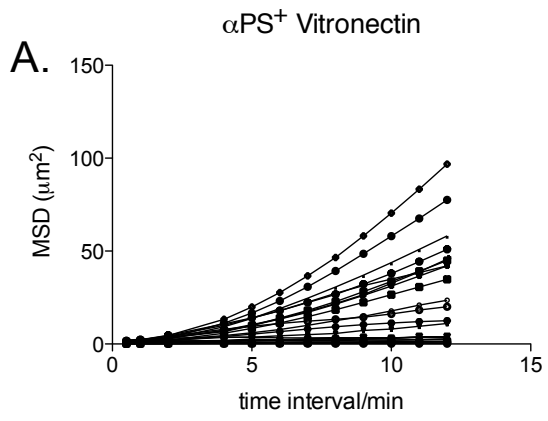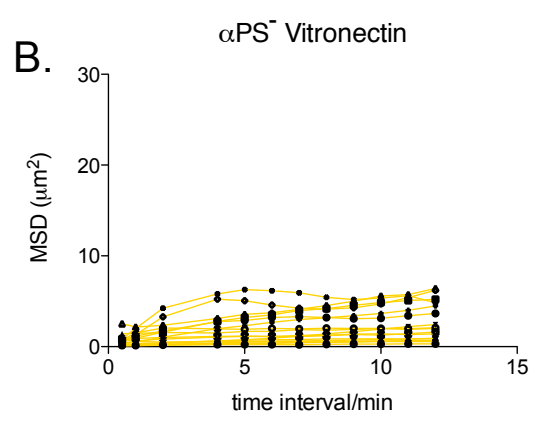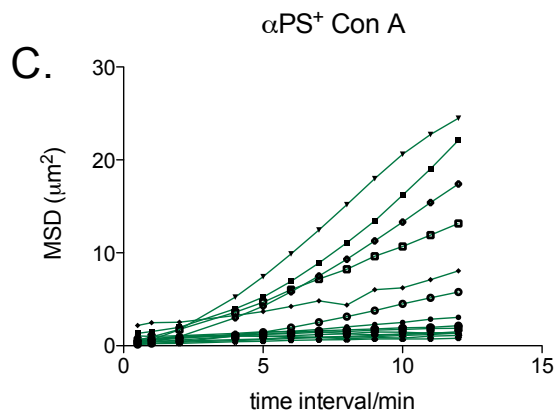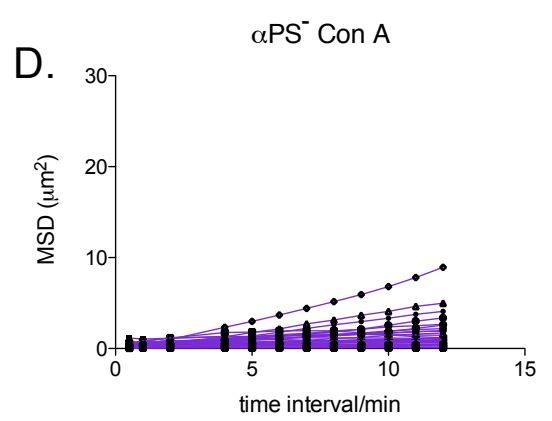

A.

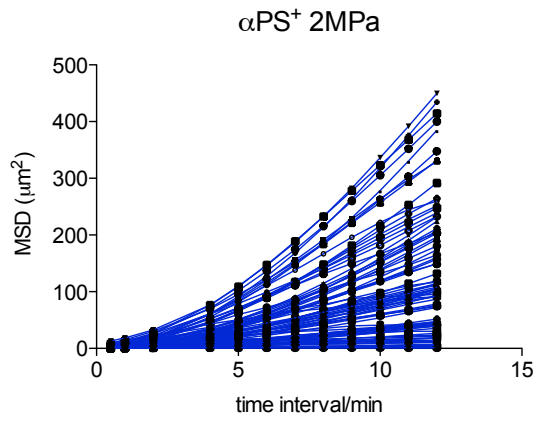

B.

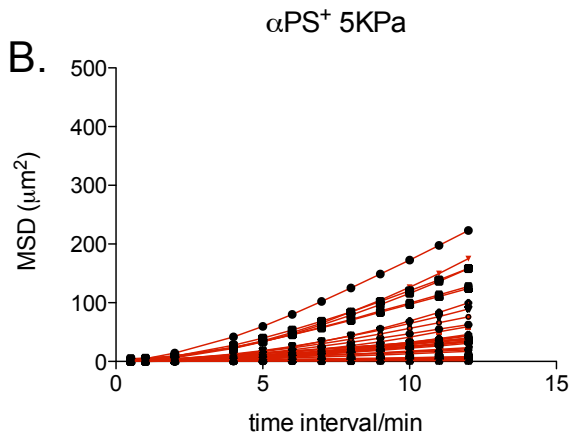

C.

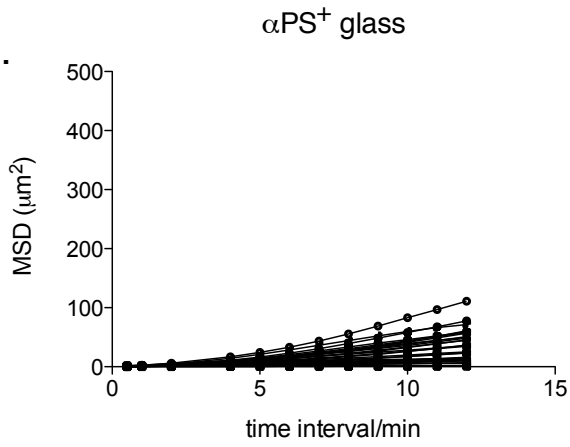

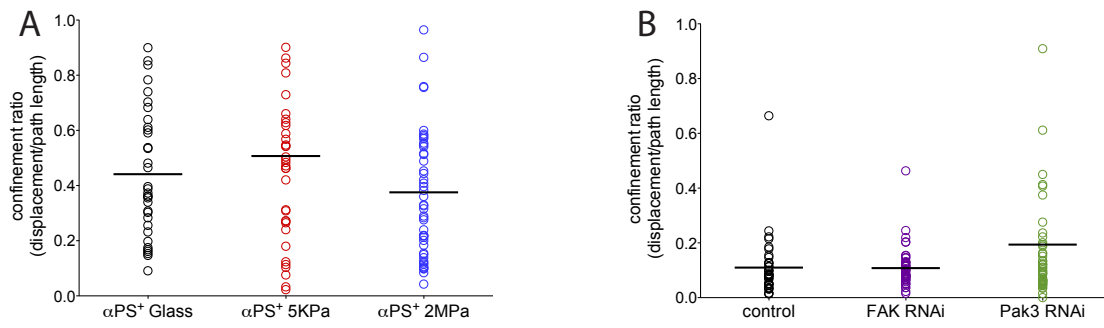

A. Control RNAi

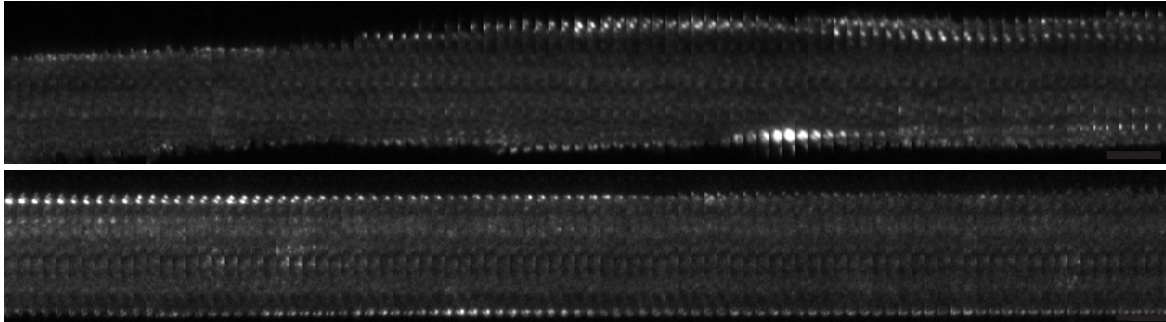

B. Fak RNAi

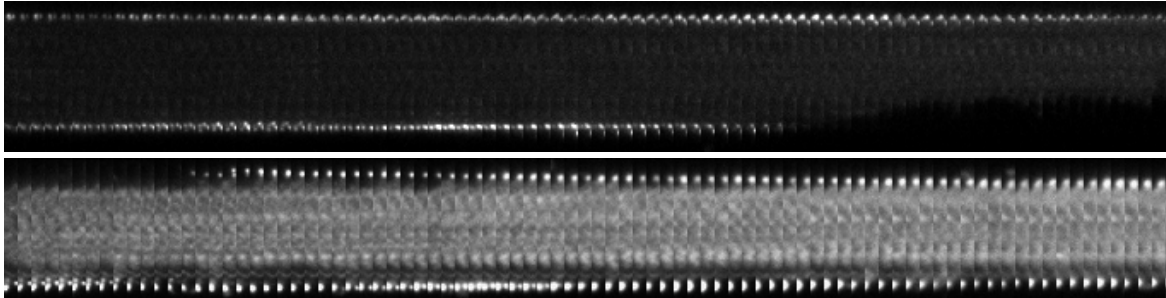

C. Pak3 RNAi

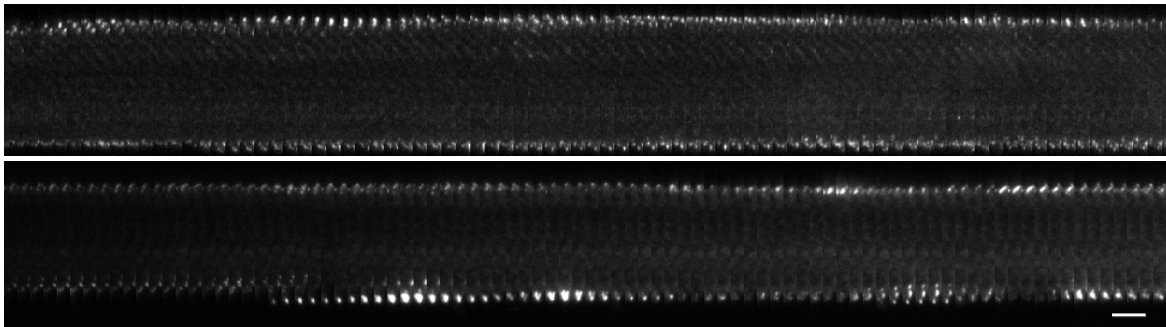

10 min



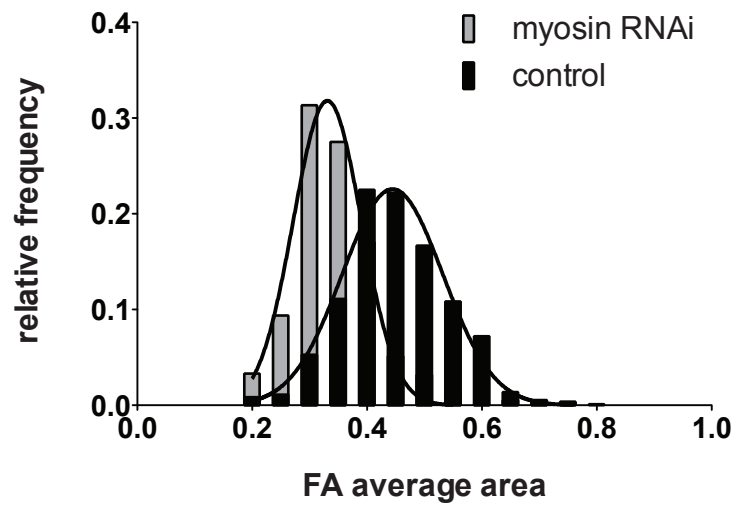

|           | control | myosin RNAi |
|-----------|---------|-------------|
| Amplitude | 0.2257  | 0.3181      |
| Mean      | 0.4445  | 0.3310      |
| SD        | 0.08761 | 0.05934     |
